# Supplementary material for: Glucagon-like peptide-1 receptor agonists in diabetic kidney disease: A review of their kidney and heart protection
Source: PubMed Central journal article supplement — Am J Prev Cardiol. 2023 May 24;14:100502. doi: 10.1016/j.ajpc.2023.100502 (PMC10258236; doi:10.1016/j.ajpc.2023.100502), 2023-05-24
Supplement: mmc1.pdf [file mmc1.pdf]

**Order Number:** 1205049

**Order Date:** 29 Mar 2022

### Payment Information

Mary Kate Dougherty  
 mkdougherty@ethoshc.com  
**Payment method:** Credit Card

**Billing Address:**  
 Mary Kate Dougherty  
 ETHOS Health Communica  
 tions  
 642 Newtown Yardley Roa  
 d, Suite 100  
 Newtown, PA 18940  
 United States

**Customer Location:**  
 Mary Kate Dougherty  
 ETHOS Health Communica  
 tions  
 642 Newtown Yardley Roa  
 d, Suite 100  
 Newtown, PA 18940  
 United States

mkdougherty@ethoshc.co  
 m

### Order Details

#### 1. Kidney360

**Billing Status:**  
 Open

|                            |           |                    |                                 |
|----------------------------|-----------|--------------------|---------------------------------|
| <b>Order License ID</b>    | 1205049-1 | <b>Type of use</b> | Republish in a journal/magazine |
| <b>Order detail status</b> | Completed | <b>Publisher</b>   | ASN Alliance for Kidney Health  |
| <b>ISSN</b>                | 2641-7650 | <b>Portion</b>     | Chart/graph/table/figure        |
|                            |           |                    | <b>803.50 USD</b>               |
|                            |           |                    | Republication Permission        |

### LICENSED CONTENT

|                          |            |                         |                                |
|--------------------------|------------|-------------------------|--------------------------------|
| <b>Publication Title</b> | Kidney360  | <b>Rightsholder</b>     | American Society of Nephrology |
| <b>Date</b>              | 01/01/2020 | <b>Publication Type</b> | e-Journal                      |

### REQUEST DETAILS

|                                                               |                          |                                  |                                  |
|---------------------------------------------------------------|--------------------------|----------------------------------|----------------------------------|
| <b>Portion Type</b>                                           | Chart/graph/table/figure | <b>Distribution</b>              | Worldwide                        |
| <b>Number of charts / graphs / tables / figures requested</b> | 1                        | <b>Translation</b>               | Original language of publication |
| <b>Format (select all that apply)</b>                         | Print,Electronic         | <b>Copies for the disabled?</b>  | No                               |
|                                                               |                          | <b>Minor editing privileges?</b> | No                               |

|                                 |                                         |                             |     |
|---------------------------------|-----------------------------------------|-----------------------------|-----|
| Who will republish the content? | Publisher, for profit                   | Incidental promotional use? | No  |
| Duration of Use                 | Life of current and all future editions | Currency                    | USD |
| Lifetime Unit Quantity          | Up to 44,999                            |                             |     |
| Rights Requested                | Main product                            |                             |     |

### NEW WORK DETAILS

|             |                                 |                                 |                              |
|-------------|---------------------------------|---------------------------------|------------------------------|
| Title       | GLP-1 RAs in DKD Review         | Publisher                       | American Medical Association |
| Author      | Erin D. Michos, MD, MHS, et al. | Expected publication date       | 2022-05-31                   |
| Publication | JAMA Cardiology                 | Expected size (number of pages) | 10                           |

### ADDITIONAL DETAILS

|                        |         |                                                               |                                  |
|------------------------|---------|---------------------------------------------------------------|----------------------------------|
| Order reference number | 4689-01 | The requesting person / organization to appear on the license | MKD on behalf of author and Novo |
|------------------------|---------|---------------------------------------------------------------|----------------------------------|

### REUSE CONTENT DETAILS

|                                                           |                                |                                                  |                                                                                                                                                      |
|-----------------------------------------------------------|--------------------------------|--------------------------------------------------|------------------------------------------------------------------------------------------------------------------------------------------------------|
| Title, description or numeric reference of the portion(s) | Figure 2                       | Title of the article/chapter the portion is from | Clinical Outcomes by Albuminuria Status with Dulaglutide versus Insulin Glargine in Participants with Diabetes and CKD: AWARD-7 Exploratory Analysis |
| Editor of portion(s)                                      | American Society of Nephrology | Author of portion(s)                             | Tuttle KR, et al                                                                                                                                     |
| Volume of serial or monograph                             | 2                              | Issue, if republishing an article from a serial  | 2                                                                                                                                                    |
| Page or page range of portion                             | 254-262                        | Publication date of portion                      | 2020-01-01                                                                                                                                           |

**Total Items: 1**

Subtotal: 803.50 USD

**Order Total: 803.50 USD**
